# Supplementary material
Source: publisher site journal article supplement (https://www.spandidos-publications.com/5406/downloadSupplementary)
Supplement: Supplementary file 1 [file downloadSupplementary]

## Sheet: Sheet1
Table SI. The oligonucleotides and primers used in the present study.
Name	Sequence (5'-3')
For overexpression miR-27a-3p and shRNA vector construction (using U6M2 vector)
miR-27a-3p-sense	GATCTGGGAACTTAGCCACTGTGAAACCCTGACCCAGTTTCACAGTGGCTAAGTTCCGCTTTTTGGTAC
miR-27a-3p-antisense	CAAAAAGCGGAACTTAGCCACTGTGAAACTGGGTCAGGGTTTCACAGTGGCTAAGTTCCCA
shR1-TAB3-sense	GATCTGGCGGTTGAAGTCTGAAGTTAACGAATTAACTTCAGACTTCAACCGCTTTTTGGTAC
shR1-TAB3-antisense	CAAAAAGCGGTTGAAGTCTGAAGTTAATTCGTTAACTTCAGACTTCAACCGCCA
shR2-TAB3-sense	GATCTGCACTATAGCCAGCGTCCTTTACGAATAAAGGACGCTGGCTATAGTGTTTTTGGTAC
shR2-TAB3-antisense	CAAAAACACTATAGCCAGCGTCCTTTATTCGTAAAGGACGCTGGCTATAGTGCA
shR1-AGO2-sense	GATCTGCAATCAAATTACAGGCCAATTCGAAAATTGGCCTGTAATTTGATTGTTTTTGGTAC
shR1-AGO2-antisense	CAAAAACAATCAAATTACAGGCCAATTTTCGAATTGGCCTGTAATTTGATTGCA
shR2-AGO2-sense	GATCTGACAGATTCCCAAAGGGTAAAGCGAACTTTACCCTTTGGGAATCTGTTTTTTGGTAC
shR2-AGO2-antisense	CAAAAAACAGATTCCCAAAGGGTAAAGTTCGCTTTACCCTTTGGGAATCTGTCA
shR-p65-sense	GATCTGCGGATTGAGGAGAAACGTAAACGAATTTACGTTTCTCCTCAATCCGTTTTTGGTAC
shR-p65-antisense	CAAAAACGGATTGAGGAGAAACGTAAATTCGTTTACGTTTCTCCTCAATCCGCA
For overexpression TAB3 construction (using KBE vector)
TAB3 Forward	GGGGTACCGCGCAAAGCAGCCCACAG
TAB3 Reverse	CGGAATTCTCAGGTGTACCGTGGCATCT
For miR-27a promoter reporter vector construction (using pGL3 vector)
P1 Forward	ATCGCTCGAGGCCCCTCACCAATCTCTA
P1 Reverse	ATCGAAGCTTCTCTCTGCCCACCTTGAC
P2 Forward (P2-F1)	ATCGCTCGAGAGAAAGACAGCAGAGGCG
P2 Reverse (P2-R756)	ATCGAAGCTTCCCCACATCCTAGACCAC
P2-R175	ATCGAAGCTTCAAAGCACCACCTAGATCG
P2-R259	ATCGAAGCTTCGCCGTTATTCATGGAG
P2-R509	ATCGAAGCTTCAGGACACCAGGAGGGA
P2-F259	ATCGCTCGAGCTCCATGAATAACGGCG
P2-F509	ATCGCTCGAGTCCCTCCTGGTGTCCTG
For 3'UTR EGFP reporter vector coonstruction (using pcDNA3/EGFP vector)
wt-UTR-TAB3-sense	GATCCCTACAGTTTATGCAAACTGTGAAG
wt-UTR-TAB3-anrisense	AATTCTTCACAGTTTGCATAAACTGTAGG
mut-UTR-TAB3-sense	GATCCCTACAGTTTATGCAAAGAGACAAG
mut-UTR-TAB3-snrisense	AATTCTTGTCTCTTTGCATAAACTGTAGG
wt-UTR-MAP3K14-sense	GATCCGTAGCATTAAATCAGCTGTGAATG
wt-UTR-MAP3K14-anrisense	AATTCATTCACAGCTGATTTAATGCTACG
mut-UTR-MAP3K14-sense	GATCCGTAGCATTAAATCAGCACTCTATG
mut-UTR-MAP3K14-snrisense	AATTCATAGAGTGCTGATTTAATGCTACG
wt-UTR-TRAF3-sense	GATCCGTCTCTCAGTGTCCAACTGTGATG
wt-UTR-TRAF3-anrisense	AATTCATCACAGTTGGACACTGAGAGACG
mut-UTR-TRAF3-sense	GATCCGTCTCTCAGTGTCCAAGAGACATG
mut-UTR-TRAF3-snrisense	AATTCATGTCTCTTGGACACTGAGAGACG
Primers for RT-qPCR
RT primer for U6	GTCGTATCCAGTGCAGGGTCCGAGGTATTCGCACTGGATACGACAAAATATGGAAC
RT primer for miR-27a-3p	GTCGTATCCAGTGCAGGGTCCGAGGTGCACTGGATACGACGCGGAAC
RT primer for miR-23a-3p	GTCGTATCCAGTGCAGGGTCCGAGGTGCACTGGATACGACGGAAATC
RT primer for miR-24-2-3p	GTCGTATCCAGTGCAGGGTCCGAGGTGCACTGGATACGACCTGTTCC
qPCR-U6 Forward	TGCGGGTGCTCGCTTCGGCAGC
qPCR-miR-27a-3p Forward	TGCGGTTCACAGTGGCTAAGT
qPCR-miR-23a-3p Forward	TGCGGATCACATTGCCAGGGA
qPCR-miR-24-2-3p Forward	TGCGGGGCTCAGTTCAGCAGG
qPCR-Reverse primer for small RNA	CCAGTGCAGGGTCCGAGGT
qPCR-pri-miR-23a/27a/24-2 Forward	GTGTGGTGGCTCCTGCATAT
qPCR-pri-miR-23a/27a/24-2 Reverse	CACCTGGAGGGGAGAAAGAG
qPCR-TAB3 Forward	AGCAGCCCACAGCTTGATATT
qPCR-TAB3 Reverse	ACTAGGAGAATGGATACCCAGGT
qPCR-β-actin Forward	CGTGACATTAAGGAGAAGCTG
qPCR-β-actin Reverse	CTAGAAGCATTTGCGGTGGAC
qPCR-MAP3K14 Forward	AAAATGGCCCGTGTGTGTTG
qPCR-MAP3K14 Reverse	GCCGAGTGGAGACTCATCC
qPCR-TRAF3 Forward	GCGTGTCAAGAGAGCATCGTT
qPCR-TRAF3 Reverse	GCAGATGTCCCAGCATTAACT
qPCR-Cyclin D1 Forward	CAATGACCCCGCACGATTTC
qPCR-Cyclin D1 Reverse	CATGGAGGGCGGATTGGAA
qPCR-C-Myc Forward	GGCTCCTGGCAAAAGGTCA
qPCR-C-Myc Reverse	CTGCGTAGTTGTGCTGATGT
qPCR-VEGFB Forward	GAGATGTCCCTGGAAGAACACA
qPCR-VEGFB Reverse	GAGTGGGATGGGTGATGTCAG
